# Supplementary material for: Microbiota of little penguins and short-tailed shearwaters during development
Source: PLoS One. 2017 Aug 14;12(8):e0183117. doi: 10.1371/journal.pone.0183117 (PMC5555571; doi:10.1371/journal.pone.0183117)
Supplement: S1 Table — (XLSX) [file pone.0183117.s001.xlsx]

## Sheet: Sheet1
	2	5	8	11	14	25	1	3	5	7	9	25																		sts-lp anova
#OTU ID	F	G	H	I	J	Y	T	U	V	W	X	O	sum		all-pearson	r	r^2	pval_bon		sts-pearson	r^2	p	pval_bon		lp-pearson	r^2	p	pval_bon		Test-Statistic	Bonferroni_P	lp_mean	sts_mean
Environmental Information Processing:Membrane Transport:Transporters	87558	32588	168922	153869	96512	283391	335632	282799	63538	102020	184089	63730	1854648		Environmental Information Processing:Membrane Transport:Transporters	-0.0552001	0.00304705	1		0.400933	0.160747	0.251772	1		-0.661384	0.437429	0.112065	1		0.345578	1	171968	137140
Unclassified:Poorly Characterized:General function prediction only	48584	17654	93085	82014	50871	151069	173816	130961	39193	51600	91730	43850	974427		Unclassified:Poorly Characterized:General function prediction only	0.00656959	4.31595e-05	1		0.364636	0.13296	0.273117	1		-0.689268	0.475091	0.0989747	1		0.251333	1	88525	73879.5
Environmental Information Processing:Membrane Transport:ABC transporters	40686	15751	88973	76692	45569	136396	195099	164750	31359	50797	89983	35396	971451		Environmental Information Processing:Membrane Transport:ABC transporters	-0.127642	0.0162925	1		0.380768	0.144985	0.263587	1		-0.720152	0.518618	0.0850277	1		0.660818	1	94564	67344.5
Genetic Information Processing:Replication and Repair:DNA repair and recombination proteins	38782	14091	70403	62807	40962	121658	109603	80386	31442	39717	73000	31321	714172		Genetic Information Processing:Replication and Repair:DNA repair and recombination proteins	0.135834	0.0184509	1		0.377969	0.14286	0.265236	1		-0.566634	0.321074	0.15963	1		0.0196743	1	60911.5	58117.2
Metabolism:Nucleotide Metabolism:Purine metabolism	36979	13514	65229	59425	40093	113561	96177	69994	25141	31843	56312	26061	634329		Metabolism:Nucleotide Metabolism:Purine metabolism	0.168301	0.0283253	1		0.402498	0.162004	0.250859	1		-0.644447	0.415312	0.120232	1		0.0455507	1	50921.3	54800.2
Genetic Information Processing:Transcription:Transcription factors	25750	9273	48398	44194	27851	75992	119611	96930	19209	30013	55221	19225	571667		Genetic Information Processing:Transcription:Transcription factors	-0.172392	0.0297191	1		0.393944	0.155192	0.255854	1		-0.718659	0.516471	0.0856877	1		0.837583	1	56701.5	38576.3
Environmental Information Processing:Signal Transduction:Two-component system	21685	7779	52369	38762	21562	65174	129534	105139	19470	23772	31162	28636	545044		Environmental Information Processing:Signal Transduction:Two-component system	-0.198283	0.0393163	1		0.280711	0.0787989	0.323669	1		-0.852492	0.726742	0.0332414	1		1.02031	1	56285.5	34555.2
Genetic Information Processing:Translation:Ribosome	32139	11527	54266	49962	33663	98831	69731	47701	25983	33247	60463	23554	541067		Genetic Information Processing:Translation:Ribosome	0.268814	0.072261	1		0.38727	0.149978	0.259766	1		-0.286232	0.0819287	0.320299	1		0.0521439	1	43446.5	46731.3
Unclassified:Poorly Characterized:Function unknown	24729	8827	46533	39849	25913	76510	116885	89343	16234	19853	26359	24463	515498		Unclassified:Poorly Characterized:Function unknown	-0.102329	0.0104711	1		0.36012	0.129686	0.275797	1		-0.856354	0.733343	0.0319637	1		0.347839	1	48856.2	37060.2
Environmental Information Processing:Membrane Transport:Secretion system	21296	7382	38643	33785	21046	65671	114544	89607	15156	20546	27419	22997	478092		Environmental Information Processing:Membrane Transport:Secretion system	-0.156737	0.0245666	1		0.334008	0.111561	0.291387	1		-0.846253	0.716145	0.0353374	1		0.790896	1	48378.2	31303.8
Metabolism:Enzyme Families:Peptidases	24784	8575	44133	38165	24797	71556	74164	57302	23154	28361	57484	21447	473922		Metabolism:Enzyme Families:Peptidases	0.0386768	0.0014959	1		0.339386	0.115183	0.288163	1		-0.456323	0.20823	0.219919	1		0.433093	1	43652	35335
Metabolism:Nucleotide Metabolism:Pyrimidine metabolism	26476	9586	46768	42670	28466	80852	61596	44652	20296	25812	48916	18723	454813		Metabolism:Nucleotide Metabolism:Pyrimidine metabolism	0.21666	0.0469415	1		0.397356	0.157892	0.25386	1		-0.410963	0.168891	0.245936	1		0.0406768	1	36665.8	39136.3
Unclassified:Cellular Processes and Signaling:Other ion-coupled transporters	18788	6880	39670	33380	20672	66002	94901	76538	13150	17423	28052	18873	434329		Unclassified:Cellular Processes and Signaling:Other ion-coupled transporters	-0.0919837	0.008461	1		0.371228	0.13781	0.269215	1		-0.819053	0.670847	0.044924	1		0.405464	1	41489.5	30898.7
Genetic Information Processing:Replication and Repair:Chromosome	19571	7209	36665	32908	21026	60375	65284	48796	15626	21764	39875	15773	384872		Genetic Information Processing:Replication and Repair:Chromosome	0.0248568	0.000617863	1		0.386193	0.149145	0.260398	1		-0.610081	0.372199	0.137269	1		0.192459	1	34519.7	29625.7
Genetic Information Processing:Translation:Ribosome Biogenesis	19509	7185	34752	32376	21382	62020	64593	47462	13725	20149	33487	14632	371272		Genetic Information Processing:Translation:Ribosome Biogenesis	0.0507366	0.0025742	1		0.412994	0.170564	0.244758	1		-0.686098	0.470731	0.10044	1		0.0614886	1	32341.3	29537.3
Cellular Processes:Cell Motility:Bacterial motility proteins	14543	4351	35844	21821	11101	36492	86144	76423	18211	18885	22849	23180	369844		Cellular Processes:Cell Motility:Bacterial motility proteins	-0.25467	0.0648567	1		0.139271	0.0193963	0.411625	1		-0.86138	0.741975	0.030325	1		2.11312	1	40948.7	20692
Metabolism:Amino Acid Metabolism:Amino acid related enzymes	20989	7404	35939	31915	21498	61347	55595	41454	16609	19931	34628	17203	364512		Metabolism:Amino Acid Metabolism:Amino acid related enzymes	0.139493	0.0194583	1		0.362882	0.131683	0.274158	1		-0.627688	0.393992	0.128465	1		0.0113781	1	30903.3	29848.7
Metabolism:Carbohydrate Metabolism:Amino sugar and nucleotide sugar metabolism	17616	6021	28047	26333	17815	53657	50257	38750	15859	21378	39758	15710	331201		Metabolism:Carbohydrate Metabolism:Amino sugar and nucleotide sugar metabolism	0.106969	0.0114424	1		0.373619	0.139591	0.267802	1		-0.427597	0.182839	0.236323	1		0.366835	1	30285.3	24914.8
Metabolism:Carbohydrate Metabolism:Glycolysis / Gluconeogenesis	17205	6067	30087	27158	17649	53158	47900	38094	12802	16151	27840	13735	307846		Metabolism:Carbohydrate Metabolism:Glycolysis / Gluconeogenesis	0.125232	0.0156829	1		0.366429	0.13427	0.272055	1		-0.666248	0.443886	0.10975	1		0.00959267	1	26087	25220.7
Metabolism:Carbohydrate Metabolism:Pyruvate metabolism	16667	5982	30838	27169	17176	53722	49617	35451	12308	15181	24588	14540	303239		Metabolism:Carbohydrate Metabolism:Pyruvate metabolism	0.146785	0.0215459	1		0.358563	0.128567	0.276722	1		-0.724074	0.524283	0.0833004	1		5.867e-06	1	25280.8	25259
Metabolism:Energy Metabolism:Oxidative phosphorylation	17206	5515	30297	22749	14606	48369	50513	35566	17932	15041	23612	21555	302961		Metabolism:Energy Metabolism:Oxidative phosphorylation	0.138311	0.0191301	1		0.205847	0.0423732	0.369885	1		-0.805614	0.649014	0.0499131	1		0.270673	1	27369.8	23123.7
Metabolism:Amino Acid Metabolism:Arginine and proline metabolism	15017	5198	29742	24082	14290	45374	49626	36646	13771	16066	26613	15899	292324		Metabolism:Amino Acid Metabolism:Arginine and proline metabolism	0.0569361	0.00324172	1		0.290153	0.084189	0.317908	1		-0.706911	0.499723	0.0909333	1		0.255939	1	26436.8	22283.8
Genetic Information Processing:Replication and Repair:DNA replication proteins	15775	5687	28704	25797	16847	48933	42415	31893	13021	16586	31687	12302	289647		Genetic Information Processing:Replication and Repair:DNA replication proteins	0.145047	0.0210387	1		0.38641	0.149313	0.26027	1		-0.479703	0.230115	0.206766	1		0.0169094	1	24650.7	23623.8
Metabolism:Energy Metabolism:Methane metabolism	16071	5414	27229	23297	15702	46339	44270	32943	14697	17029	29975	15240	288206		Metabolism:Energy Metabolism:Methane metabolism	0.121948	0.0148714	1		0.324244	0.105134	0.297256	1		-0.579322	0.335614	0.15301	1		0.199036	1	25692.3	22342
Unclassified:Metabolism:Others	15413	5430	30079	26541	16317	49136	48060	37076	11363	12563	23150	12649	287777		Unclassified:Metabolism:Others	0.0911797	0.00831374	1		0.370084	0.136962	0.269892	1		-0.73918	0.546387	0.0767447	1		0.00135741	1	24143.5	23819.3
Genetic Information Processing:Translation:Aminoacyl-tRNA biosynthesis	17037	6136	29678	26602	17770	51422	33947	23527	13461	16213	29777	12359	277929		Genetic Information Processing:Translation:Aminoacyl-tRNA biosynthesis	0.30222	0.0913371	1		0.37521	0.140783	0.266863	1		-0.284685	0.0810458	0.321242	1		0.195543	1	21547.3	24774.2
Genetic Information Processing:Folding, Sorting and Degradation:Chaperones and folding catalysts	14901	5109	24404	21517	14628	44661	52061	39058	11815	12721	19915	15178	275968		Genetic Information Processing:Folding, Sorting and Degradation:Chaperones and folding catalysts	0.0307479	0.000945433	1		0.336118	0.112975	0.290121	1		-0.808011	0.652882	0.0490115	1		0.238323	1	25124.7	20870
Metabolism:Energy Metabolism:Carbon fixation pathways in prokaryotes	14167	4701	26686	21140	13033	43223	46484	32717	13735	14697	23584	16347	270514		Metabolism:Energy Metabolism:Carbon fixation pathways in prokaryotes	0.093063	0.00866072	1		0.267603	0.0716116	0.331694	1		-0.737697	0.544197	0.0773814	1		0.291744	1	24594	20491.7
Unclassified:Genetic Information Processing:Replication, recombination and repair proteins	12336	3928	19223	18618	12193	38791	54838	47842	10325	11761	18624	11017	259496		Unclassified:Genetic Information Processing:Replication, recombination and repair proteins	-0.115412	0.0133199	1		0.367832	0.1353	0.271224	1		-0.814292	0.663072	0.0466729	1		0.741856	1	25734.5	17514.8
Metabolism:Amino Acid Metabolism:Alanine, aspartate and glutamate metabolism	13830	4833	23781	20868	13877	41330	37630	27950	12059	13962	25318	12971	248409		Metabolism:Amino Acid Metabolism:Alanine, aspartate and glutamate metabolism	0.153712	0.0236274	1		0.346577	0.120115	0.283863	1		-0.5791	0.335357	0.153125	1		0.0822408	1	21648.3	19753.2
Environmental Information Processing:Membrane Transport:Phosphotransferase system (PTS)	11194	3574	15044	17228	11931	35390	46455	41460	8376	16807	31543	5251	244253		Environmental Information Processing:Membrane Transport:Phosphotransferase system (PTS)	-0.148754	0.0221277	1		0.460249	0.211829	0.217697	1		-0.534091	0.285253	0.176926	1		1.23571	1	24982	15726.8
Metabolism:Amino Acid Metabolism:Cysteine and methionine metabolism	12504	4395	22413	19692	12747	37070	39168	32123	10971	13867	26248	10897	242095		Metabolism:Amino Acid Metabolism:Cysteine and methionine metabolism	0.0239634	0.000574246	1		0.354135	0.125412	0.279356	1		-0.582836	0.339698	0.151189	1		0.367787	1	22212.3	18136.8
Metabolism:Carbohydrate Metabolism:Butanoate metabolism	13160	4974	24322	22396	14042	39406	43647	31584	8073	10948	17638	10282	240472		Metabolism:Carbohydrate Metabolism:Butanoate metabolism	0.0362758	0.00131594	1		0.388894	0.151239	0.258813	1		-0.768034	0.589876	0.0646726	1		0.00724106	1	20362	19716.7
Unclassified:Genetic Information Processing:Translation proteins	11498	4067	20952	18661	11832	36009	41719	30129	10387	13963	26111	9937	235265		Unclassified:Genetic Information Processing:Translation proteins	-0.00705455	4.97666e-05	1		0.361854	0.130938	0.274768	1		-0.591825	0.350257	0.146558	1		0.5011	1	22041	17169.8
Metabolism:Carbohydrate Metabolism:Pentose phosphate pathway	12634	4354	19879	18298	12804	39016	35402	27521	10432	12248	21886	10815	225289		Metabolism:Carbohydrate Metabolism:Pentose phosphate pathway	0.13379	0.0178999	1		0.370604	0.137348	0.269584	1		-0.639396	0.408828	0.122698	1		0.0875139	1	19717.3	17830.8
Metabolism:Carbohydrate Metabolism:Starch and sucrose metabolism	12877	4437	17603	18304	13671	39078	34420	28568	8967	12274	21850	9699	221748		Metabolism:Carbohydrate Metabolism:Starch and sucrose metabolism	0.129772	0.0168408	1		0.441762	0.195154	0.228201	1		-0.611712	0.374191	0.136447	1		0.0645385	1	19296.3	17661.7
Metabolism:Amino Acid Metabolism:Glycine, serine and threonine metabolism	11829	4345	22489	19133	12141	33303	40460	30176	8633	10656	16440	10962	220567		Metabolism:Amino Acid Metabolism:Glycine, serine and threonine metabolism	-0.00474677	2.25318e-05	1		0.344797	0.118885	0.284926	1		-0.783649	0.614105	0.0584011	1		0.123175	1	19554.5	17206.7
Genetic Information Processing:Replication and Repair:Homologous recombination	12027	4307	21367	19260	12656	36691	31906	22924	10345	13552	25023	9679	219737		Genetic Information Processing:Replication and Repair:Homologous recombination	0.152561	0.0232748	1		0.380447	0.14474	0.263776	1		-0.417246	0.174094	0.242296	1		0.0412995	1	18904.8	17718
Unclassified:Metabolism:Energy metabolism	8136	2459	15036	11640	6690	24061	48923	36629	11705	13890	25208	13188	217565		Unclassified:Metabolism:Energy metabolism	-0.201713	0.0406883	1		0.207281	0.0429654	0.368992	1		-0.708096	0.5014	0.0904001	1		3.86305	1	24923.8	11337
Metabolism:Metabolism of Cofactors and Vitamins:Porphyrin and chlorophyll metabolism	8411	2715	18679	12821	6904	22591	32126	27352	13404	16247	33764	11122	206136		Metabolism:Metabolism of Cofactors and Vitamins:Porphyrin and chlorophyll metabolism	-0.130683	0.0170781	1		0.184087	0.0338879	0.383472	1		-0.133617	0.0178534	0.415191	1		4.11006	1	22335.8	12020.2
Metabolism:Carbohydrate Metabolism:Fructose and mannose metabolism	9469	2978	13753	13619	8855	30325	35355	30809	9772	14697	27342	9148	206122		Metabolism:Carbohydrate Metabolism:Fructose and mannose metabolism	-0.0472093	0.00222872	1		0.33762	0.113987	0.289221	1		-0.466489	0.217612	0.214177	1		1.78766	1	21187.2	13166.5
Metabolism:Glycan Biosynthesis and Metabolism:Peptidoglycan biosynthesis	11711	4256	20357	18979	12564	35823	29545	21859	8581	11264	20542	8244	203725		Metabolism:Glycan Biosynthesis and Metabolism:Peptidoglycan biosynthesis	0.172582	0.0297844	1		0.402581	0.162071	0.250811	1		-0.532865	0.283945	0.177586	1		0.0116887	1	16672.5	17281.7
Genetic Information Processing:Replication and Repair:Mismatch repair	10968	3946	20236	17912	11621	33266	27240	20298	9394	12160	23705	8194	198940		Genetic Information Processing:Replication and Repair:Mismatch repair	0.163847	0.0268459	1		0.376573	0.141807	0.26606	1		-0.31724	0.100641	0.301479	1		0.00931089	1	16831.8	16324.8
Metabolism:Energy Metabolism:Nitrogen metabolism	9074	3151	15692	13715	9091	29316	43236	36300	7175	8368	13085	10276	198479		Metabolism:Energy Metabolism:Nitrogen metabolism	-0.097529	0.00951191	1		0.34441	0.118618	0.285157	1		-0.826433	0.682992	0.0422533	1		0.745522	1	19740	13339.8
Metabolism:Amino Acid Metabolism:Lysine biosynthesis	11992	4216	20187	18296	12481	35863	25945	18872	8866	10892	19517	8521	195648		Metabolism:Amino Acid Metabolism:Lysine biosynthesis	0.252095	0.0635519	1		0.379786	0.144238	0.264165	1		-0.474088	0.224759	0.209908	1		0.109459	1	15435.5	17172.5
Metabolism:Carbohydrate Metabolism:Propanoate metabolism	9542	3700	21937	18014	9897	33102	35025	24396	6997	8161	12967	9662	193400		Metabolism:Carbohydrate Metabolism:Propanoate metabolism	0.0890948	0.00793788	1		0.326026	0.106293	0.296183	1		-0.797442	0.635913	0.053024	1		0.00072525	1	16201.3	16032
Genetic Information Processing:Transcription:Transcription machinery	10082	3525	20001	15679	9701	27966	26101	19088	10588	12291	21736	11365	188123		Genetic Information Processing:Transcription:Transcription machinery	0.158983	0.0252755	1		0.286474	0.0820671	0.320151	1		-0.378493	0.143257	0.264927	1		0.290061	1	16861.5	14492.3
Metabolism:Amino Acid Metabolism:Phenylalanine, tyrosine and tryptophan biosynthesis	11126	3983	19775	17195	11342	31828	29393	20395	8092	8752	14194	9752	185827		Metabolism:Amino Acid Metabolism:Phenylalanine, tyrosine and tryptophan biosynthesis	0.166081	0.0275829	1		0.351622	0.123638	0.280852	1		-0.746832	0.557759	0.0734843	1		0.0225266	1	15096.3	15874.8
Metabolism:Amino Acid Metabolism:Valine, leucine and isoleucine biosynthesis	11241	4136	19214	17529	11754	30300	28210	20320	7821	9427	15167	8649	183768		Metabolism:Amino Acid Metabolism:Valine, leucine and isoleucine biosynthesis	0.134809	0.0181735	1		0.38252	0.146322	0.262556	1		-0.70089	0.491247	0.0936557	1		0.0241517	1	14932.3	15695.7
Environmental Information Processing:Membrane Transport:Bacterial secretion system	7842	2841	14214	12988	8055	25633	42211	35348	5296	7970	11840	8289	182527		Environmental Information Processing:Membrane Transport:Bacterial secretion system	-0.147933	0.0218843	1		0.366816	0.134554	0.271825	1		-0.819949	0.672316	0.0445971	1		0.813661	1	18492.3	11928.8
Metabolism:Lipid Metabolism:Lipid biosynthesis proteins	10578	3866	20841	17185	10674	31936	27666	19480	8396	8201	12902	10516	182241		Metabolism:Lipid Metabolism:Lipid biosynthesis proteins	0.215567	0.0464692	1		0.324824	0.105511	0.296907	1		-0.779297	0.607303	0.0601298	1		0.0672438	1	14526.8	15846.7
Unclassified:Genetic Information Processing:Protein folding and associated processing	8266	2971	15207	13379	8293	25794	40069	31336	5861	7737	11786	8680	179379		Unclassified:Genetic Information Processing:Protein folding and associated processing	-0.115096	0.013247	1		0.34279	0.117505	0.286126	1		-0.82379	0.678631	0.0432039	1		0.613414	1	17578.2	12318.3
Unclassified:Cellular Processes and Signaling:Membrane and intracellular structural molecules	7147	2603	12190	11247	7525	22681	49875	39402	3895	5825	6331	9416	178137		Unclassified:Cellular Processes and Signaling:Membrane and intracellular structural molecules	-0.198399	0.0393623	1		0.39005	0.152139	0.258135	1		-0.873006	0.762139	0.0266397	1		0.973293	1	19124	10565.5
Cellular Processes:Cell Motility:Flagellar assembly	6429	1735	14850	8482	4595	14854	41256	39658	7616	6757	7425	10142	163799		Cellular Processes:Cell Motility:Flagellar assembly	-0.28694	0.0823345	1		0.0986519	0.0097322	0.437298	1		-0.874079	0.764015	0.026307	1		2.04767	1	18809	8490.83
Metabolism:Carbohydrate Metabolism:Galactose metabolism	8425	2989	11459	12253	9081	25766	28159	22355	6845	9595	19144	6874	162945		Metabolism:Carbohydrate Metabolism:Galactose metabolism	0.0119428	0.00014263	1		0.459512	0.211152	0.218114	1		-0.548152	0.300471	0.169398	1		0.632981	1	15495.3	11662.2
Metabolism:Carbohydrate Metabolism:Citrate cycle (TCA cycle)	8154	2714	16156	11894	6925	22841	32720	22882	7896	7637	11073	11115	162007		Metabolism:Carbohydrate Metabolism:Citrate cycle (TCA cycle)	-0.0296099	0.000876745	1		0.208464	0.0434572	0.368255	1		-0.839848	0.705345	0.0375304	1		0.657667	1	15553.8	11447.3
Metabolism:Lipid Metabolism:Glycerophospholipid metabolism	8007	2798	15058	12808	8216	23965	30153	22847	6811	8073	14887	7235	160858		Metabolism:Lipid Metabolism:Glycerophospholipid metabolism	-0.0429401	0.00184385	1		0.346536	0.120087	0.283887	1		-0.721632	0.520752	0.0843746	1		0.416284	1	15001	11808.7
Metabolism:Lipid Metabolism:Fatty acid biosynthesis	10017	3599	18381	15647	10415	32315	19644	13697	7631	7825	12821	8225	160217		Metabolism:Lipid Metabolism:Fatty acid biosynthesis	0.369323	0.136399	1		0.355838	0.126621	0.278342	1		-0.623544	0.388807	0.130523	1		0.585985	1	11640.5	15062.3
Genetic Information Processing:Replication and Repair:DNA replication	8980	3276	16619	14911	9638	27370	22006	15707	7200	9741	18138	6583	160169		Genetic Information Processing:Replication and Repair:DNA replication	0.186033	0.0346084	1		0.387041	0.1498	0.2599	1		-0.357433	0.127758	0.277394	1		0.00308493	1	13229.2	13465.7
Metabolism:Metabolism of Cofactors and Vitamins:Pantothenate and CoA biosynthesis	8866	3217	15914	14030	9223	25211	24615	18126	6983	8460	14966	7346	156957		Metabolism:Metabolism of Cofactors and Vitamins:Pantothenate and CoA biosynthesis	0.0995306	0.00990633	1		0.366718	0.134482	0.271884	1		-0.634193	0.402201	0.125252	1		0.025213	1	13416	12743.5
Unclassified:Cellular Processes and Signaling:Signal transduction mechanisms	7495	2614	14183	12332	7715	22385	29442	22348	6343	7841	13744	6864	153306		Unclassified:Cellular Processes and Signaling:Signal transduction mechanisms	-0.0636417	0.00405027	1		0.353494	0.124958	0.279737	1		-0.738945	0.54604	0.0768455	1		0.476655	1	14430.3	11120.7
Metabolism:Amino Acid Metabolism:Histidine metabolism	8837	3266	16852	14781	9208	24915	17939	11669	7337	9158	18104	6935	149001		Metabolism:Amino Acid Metabolism:Histidine metabolism	0.264299	0.069854	1		0.360811	0.130184	0.275387	1		-0.0693445	0.00480865	0.455889	1		0.0907239	1	11857	12976.5
Metabolism:Carbohydrate Metabolism:Glyoxylate and dicarboxylate metabolism	4878	1868	11404	9075	4514	17405	35911	27664	4874	6692	10535	7656	142476		Metabolism:Carbohydrate Metabolism:Glyoxylate and dicarboxylate metabolism	-0.19683	0.0387422	1		0.267658	0.0716406	0.331661	1		-0.819317	0.67128	0.0448275	1		1.62438	1	15555.3	8190.67
Metabolism:Metabolism of Cofactors and Vitamins:One carbon pool by folate	8337	2935	13859	12722	8636	24237	20714	14531	6384	8277	14878	6342	141852		Metabolism:Metabolism of Cofactors and Vitamins:One carbon pool by folate	0.17288	0.0298874	1		0.380794	0.145004	0.263572	1		-0.494437	0.244467	0.198574	1		0.000311332	1	11854.3	11787.7
Metabolism:Carbohydrate Metabolism:Pentose and glucuronate interconversions	7515	2698	11282	11121	8170	23542	26122	23138	4714	6050	10435	6065	140852		Metabolism:Carbohydrate Metabolism:Pentose and glucuronate interconversions	0.0016832	2.83317e-06	1		0.440755	0.194265	0.228777	1		-0.773493	0.598292	0.0624583	1		0.179058	1	12754	10721.3
Metabolism:Energy Metabolism:Carbon fixation in photosynthetic organisms	7548	2533	12982	11033	7342	22067	23063	17460	6775	7648	13856	7528	139835		Metabolism:Energy Metabolism:Carbon fixation in photosynthetic organisms	0.0751913	0.00565374	1		0.319379	0.102003	0.300188	1		-0.653786	0.427437	0.115709	1		0.310726	1	12721.7	10584.2
Genetic Information Processing:Folding, Sorting and Degradation:Protein export	6978	2644	13366	11948	7489	21399	21259	15127	5765	8001	15807	5459	135242		Genetic Information Processing:Folding, Sorting and Degradation:Protein export	0.0712866	0.00508178	1		0.381668	0.145671	0.263058	1		-0.453931	0.206053	0.221275	1		0.114485	1	11903	10637.3
Cellular Processes:Cell Motility:Bacterial chemotaxis	5420	1711	16297	9510	4498	12465	25116	22755	7418	9404	10701	8133	133428		Cellular Processes:Cell Motility:Bacterial chemotaxis	-0.243189	0.059141	1		0.166267	0.0276448	0.394641	1		-0.812186	0.659647	0.0474531	1		2.05349	1	13921.2	8316.83
Metabolism:Glycan Biosynthesis and Metabolism:Lipopolysaccharide biosynthesis proteins	5273	1594	8664	6518	4578	16563	40236	30180	4906	2845	1918	9636	132911		Metabolism:Glycan Biosynthesis and Metabolism:Lipopolysaccharide biosynthesis proteins	-0.186715	0.0348626	1		0.214861	0.0461651	0.364275	1		-0.917947	0.842627	0.0139323	1		1.2451	1	14953.5	7198.33
Metabolism:Metabolism of Cofactors and Vitamins:Thiamine metabolism	8274	2911	13576	12511	8738	22765	17561	12707	5967	7268	12684	5772	130734		Metabolism:Metabolism of Cofactors and Vitamins:Thiamine metabolism	0.223243	0.0498376	1		0.39585	0.156697	0.25474	1		-0.512816	0.26298	0.188466	1		0.114985	1	10326.5	11462.5
Metabolism:Metabolism of Terpenoids and Polyketides:Terpenoid backbone biosynthesis	7434	2681	13060	11964	7654	23253	16471	11370	6361	8379	14887	5964	129478		Metabolism:Metabolism of Terpenoids and Polyketides:Terpenoid backbone biosynthesis	0.271864	0.07391	1		0.371528	0.138033	0.269038	1		-0.228978	0.0524308	0.355512	1		0.0164449	1	10572	11007.7
Genetic Information Processing:Translation:Translation factors	6944	2481	11882	10754	7171	21465	17872	12796	5966	7601	13692	5749	124373		Genetic Information Processing:Translation:Translation factors	0.185938	0.034573	1		0.372805	0.138984	0.268283	1		-0.444778	0.197828	0.22648	1		0.0223683	1	10612.7	10116.2
Unclassified:Cellular Processes and Signaling:Pores ion channels	4009	1460	7101	6337	3902	13847	34758	27394	3263	4467	6025	7706	120269		Unclassified:Cellular Processes and Signaling:Pores ion channels	-0.213595	0.0456226	1		0.330046	0.10893	0.293766	1		-0.860383	0.740259	0.0306478	1		1.81666	1	13935.5	6109.33
Metabolism:Amino Acid Metabolism:Valine, leucine and isoleucine degradation	5774	2570	16599	12923	6007	18115	22609	13845	3621	4567	6057	6485	119172		Metabolism:Amino Acid Metabolism:Valine, leucine and isoleucine degradation	0.042676	0.00182124	1		0.296005	0.0876189	0.314347	1		-0.832093	0.692378	0.0402398	1		0.040331	1	9530.67	10331.3
Metabolism:Metabolism of Cofactors and Vitamins:Folate biosynthesis	5980	2051	11665	9359	5735	19547	20968	14847	5360	5195	9298	6430	116435		Metabolism:Metabolism of Cofactors and Vitamins:Folate biosynthesis	0.0839576	0.00704889	1		0.292181	0.0853698	0.316673	1		-0.772336	0.596503	0.0629258	1		0.129556	1	10349.7	9056.17
Metabolism:Amino Acid Metabolism:Tyrosine metabolism	6735	2432	11560	10956	7026	20332	20068	12759	4410	5320	9333	5367	116298		Metabolism:Amino Acid Metabolism:Tyrosine metabolism	0.128765	0.0165803	1		0.389595	0.151784	0.258402	1		-0.718566	0.516337	0.085729	1		0.00717771	1	9542.83	9840.17
Metabolism:Metabolism of Cofactors and Vitamins:Nicotinate and nicotinamide metabolism	5939	2145	10709	9453	6188	16870	21464	15747	4769	5929	11373	5282	115868		Metabolism:Metabolism of Cofactors and Vitamins:Nicotinate and nicotinamide metabolism	-0.0410862	0.00168807	1		0.367709	0.13521	0.271297	1		-0.682803	0.46622	0.101969	1		0.410222	1	10760.7	8550.67
Metabolism:Glycan Biosynthesis and Metabolism:Glycosyltransferases	5837	2026	9034	8353	5904	20100	24535	19297	4217	3820	5988	6015	115126		Metabolism:Glycan Biosynthesis and Metabolism:Glycosyltransferases	0.00354838	1.2591e-05	1		0.371151	0.137753	0.269261	1		-0.860681	0.740771	0.0305514	1		0.225102	1	10645.3	8542.33
Genetic Information Processing:Replication and Repair:Base excision repair	6066	2263	11529	9988	6315	18804	17724	13390	5052	6208	11383	5189	113911		Genetic Information Processing:Replication and Repair:Base excision repair	0.109788	0.0120535	1		0.357349	0.127698	0.277444	1		-0.601377	0.361654	0.141678	1		0.0441074	1	9824.33	9160.83
Cellular Processes:Cell Growth and Death:Cell cycle - Caulobacter	6898	2363	11715	10207	6790	20362	14821	10035	5838	6610	12554	5689	113882		Cellular Processes:Cell Growth and Death:Cell cycle - Caulobacter	0.275265	0.0757709	1		0.333534	0.111245	0.291671	1		-0.328849	0.108142	0.294485	1		0.0247228	1	9257.83	9722.5
Genetic Information Processing:Folding, Sorting and Degradation:RNA degradation	6251	2159	11181	9349	6112	19142	17947	12723	5497	6305	9431	6325	112422		Genetic Information Processing:Folding, Sorting and Degradation:RNA degradation	0.159687	0.0255	1		0.316204	0.0999851	0.302105	1		-0.726808	0.528249	0.0821025	1		0.0470483	1	9704.67	9032.33
Metabolism:Lipid Metabolism:Fatty acid metabolism	4819	2046	12393	10508	5009	15738	25358	16466	3131	4241	6016	5954	111679		Metabolism:Lipid Metabolism:Fatty acid metabolism	-0.0785221	0.00616572	1		0.323635	0.104739	0.297623	1		-0.838679	0.703383	0.037935	1		0.178785	1	10194.3	8418.83
Metabolism:Metabolism of Other Amino Acids:Selenocompound metabolism	6329	2364	11368	10411	7050	18154	18491	14847	3591	5339	9266	3867	111077		Metabolism:Metabolism of Other Amino Acids:Selenocompound metabolism	0.033201	0.0011023	1		0.418593	0.17522	0.241516	1		-0.702341	0.493283	0.0929977	1		0.000185948	1	9233.5	9279.33
Metabolism:Metabolism of Other Amino Acids:Glutathione metabolism	5807	2184	9362	8956	6254	20136	20980	14723	2892	3466	4791	4700	104251		Metabolism:Metabolism of Other Amino Acids:Glutathione metabolism	0.0899904	0.00809827	1		0.419523	0.175999	0.240979	1		-0.853726	0.728849	0.0328312	1		0.00234528	1	8592	8783.17
Metabolism:Enzyme Families:Protein kinases	3924	1562	10044	7990	4305	12468	26695	20994	2566	4105	4844	4702	104199		Metabolism:Enzyme Families:Protein kinases	-0.215321	0.0463631	1		0.334341	0.111784	0.291187	1		-0.857531	0.73536	0.0315775	1		0.740266	1	10651	6715.5
Metabolism:Lipid Metabolism:Glycerolipid metabolism	4744	1699	9047	8122	4789	16536	17410	12796	4590	6082	12478	3979	102272		Metabolism:Lipid Metabolism:Glycerolipid metabolism	0.0284819	0.000811218	1		0.349041	0.12183	0.282392	1		-0.497069	0.247077	0.197119	1		0.454906	1	9555.83	7489.5
Metabolism:Metabolism of Cofactors and Vitamins:Ubiquinone and other terpenoid-quinone biosynthesis	5556	2111	10281	9288	6174	18169	21920	16175	1796	1862	397	4359	98088		Metabolism:Metabolism of Cofactors and Vitamins:Ubiquinone and other terpenoid-quinone biosynthesis	0.0184247	0.000339471	1		0.409713	0.167865	0.246662	1		-0.914219	0.835797	0.014884	1		0.0382803	1	7751.5	8596.5
Metabolism:Energy Metabolism:Photosynthesis proteins	6173	2134	9918	8424	5647	17554	11528	7992	5857	5389	9310	5940	95866		Metabolism:Energy Metabolism:Photosynthesis proteins	0.369953	0.136865	1		0.278899	0.0777844	0.324777	1		-0.440182	0.19376	0.229104	1		0.0733459	1	7669.33	8308.33
Unclassified:Cellular Processes and Signaling:Inorganic ion transport and metabolism	3970	1179	6702	5013	3268	12401	25831	20633	3644	2738	3648	6328	95355		Unclassified:Cellular Processes and Signaling:Inorganic ion transport and metabolism	-0.172577	0.0297828	1		0.187377	0.0351101	0.381414	1		-0.890598	0.793164	0.0213592	1		1.3078	1	10470.3	5422.17
Metabolism:Energy Metabolism:Photosynthesis	5810	2021	9305	8033	5433	16710	10401	7167	5480	5251	9277	5374	90262		Metabolism:Energy Metabolism:Photosynthesis	0.385279	0.14844	1		0.297801	0.0886856	0.313255	1		-0.288571	0.0832733	0.318872	1		0.106226	1	7158.33	7885.33
Genetic Information Processing:Folding, Sorting and Degradation:Sulfur relay system	3698	1194	7353	5617	3273	10645	20884	15499	4208	4674	8121	5007	90173		Genetic Information Processing:Folding, Sorting and Degradation:Sulfur relay system	-0.195342	0.0381585	1		0.240384	0.0577844	0.348454	1		-0.78977	0.623736	0.0559956	1		2.00028	1	9732.17	5296.67
Genetic Information Processing:Replication and Repair:Nucleotide excision repair	5552	1972	9920	8553	5654	16350	10388	7139	4691	5407	10227	4278	90131		Genetic Information Processing:Replication and Repair:Nucleotide excision repair	0.323753	0.104816	1		0.348594	0.121518	0.282658	1		-0.122414	0.0149853	0.422264	1		0.180955	1	7021.67	8000.17
Metabolism:Glycan Biosynthesis and Metabolism:Lipopolysaccharide biosynthesis	3888	1127	6130	4229	3149	11116	25715	19721	3986	1779	683	7450	88973		Metabolism:Glycan Biosynthesis and Metabolism:Lipopolysaccharide biosynthesis	-0.160891	0.025886	1		0.141652	0.0200654	0.410124	1		-0.932983	0.870457	0.0103078	1		1.23011	1	9889	4939.83
Metabolism:Energy Metabolism:Sulfur metabolism	5034	1826	9422	7961	5272	14183	15650	11745	3171	3645	4892	4524	87325		Metabolism:Energy Metabolism:Sulfur metabolism	0.0571546	0.00326664	1		0.356472	0.127073	0.277965	1		-0.839916	0.705459	0.0375071	1		1.86775e-05	1	7271.17	7283
Unclassified:Metabolism:Amino acid metabolism	4473	1488	9059	7000	4444	11858	15933	12947	3815	3664	6913	3867	85461		Unclassified:Metabolism:Amino acid metabolism	-0.0910683	0.00829344	1		0.300379	0.0902277	0.311689	1		-0.779827	0.608131	0.0599182	1		0.307398	1	7856.5	6387
Metabolism:Carbohydrate Metabolism:C5-Branched dibasic acid metabolism	5243	1905	9136	8172	5571	14488	13898	10100	3215	3633	4878	4162	84401		Metabolism:Carbohydrate Metabolism:C5-Branched dibasic acid metabolism	0.130026	0.0169069	1		0.386536	0.14941	0.260196	1		-0.829658	0.688332	0.0411023	1		0.0956381	1	6647.67	7419.17
Metabolism:Xenobiotics Biodegradation and Metabolism:Benzoate degradation	3841	1695	9196	8850	4246	14250	15024	8593	2262	4130	6927	3744	82758		Metabolism:Xenobiotics Biodegradation and Metabolism:Benzoate degradation	0.118407	0.0140201	1		0.381174	0.145293	0.263349	1		-0.663724	0.440529	0.11095	1		0.00759508	1	6780	7013
Metabolism:Amino Acid Metabolism:Tryptophan metabolism	3387	1505	9221	7411	3373	11700	19968	12278	2311	2954	3630	4744	82482		Metabolism:Amino Acid Metabolism:Tryptophan metabolism	-0.0830788	0.00690209	1		0.28997	0.0840827	0.31802	1		-0.860559	0.740561	0.0305909	1		0.219815	1	7647.5	6099.5
Metabolism:Metabolism of Other Amino Acids:beta-Alanine metabolism	3345	1349	8252	6581	3251	10540	19339	13682	2642	3135	4713	4701	81530		Metabolism:Metabolism of Other Amino Acids:beta-Alanine metabolism	-0.13631	0.0185804	1		0.28549	0.0815043	0.320752	1		-0.8455	0.714869	0.0355933	1		0.624579	1	8035.33	5553
Metabolism:Metabolism of Terpenoids and Polyketides:Prenyltransferases	4861	1803	8971	7992	5189	15132	10649	7662	3316	4147	6946	3548	80216		Metabolism:Metabolism of Terpenoids and Polyketides:Prenyltransferases	0.274727	0.0754751	1		0.382144	0.146034	0.262778	1		-0.58858	0.346427	0.148225	1		0.334054	1	6044.67	7324.67
Metabolism:Metabolism of Cofactors and Vitamins:Riboflavin metabolism	3982	1468	8015	6810	4276	11681	14476	10952	2783	3503	5799	3387	77132		Metabolism:Metabolism of Cofactors and Vitamins:Riboflavin metabolism	-0.0284487	0.000809329	1		0.365232	0.133395	0.272764	1		-0.777755	0.604903	0.0607456	1		0.100668	1	6816.67	6038.67
Unclassified:Cellular Processes and Signaling:Sporulation	2011	544	8779	5459	1633	1473	1608	1709	7708	12620	30530	782	74856		Unclassified:Cellular Processes and Signaling:Sporulation	-0.121477	0.0147566	1		0.193968	0.0376234	0.377295	1		0.911259	0.830393	0.015654	1		1.45579	1	9159.5	3316.5
Metabolism:Amino Acid Metabolism:Lysine degradation	2476	1130	8026	6183	2569	8664	19520	13427	1834	2367	3520	3908	73624		Metabolism:Amino Acid Metabolism:Lysine degradation	-0.192713	0.0371384	1		0.286016	0.0818049	0.320431	1		-0.857956	0.736088	0.0314385	1		0.632139	1	7429.33	4841.33
Unclassified:Cellular Processes and Signaling:Other transporters	3308	1160	5451	5193	3472	9898	14786	10782	2705	4262	7925	2937	71879		Unclassified:Cellular Processes and Signaling:Other transporters	-0.122988	0.0151261	1		0.39892	0.159137	0.252946	1		-0.654118	0.42787	0.11555	1		1.14647	1	7232.83	4747
Metabolism:Xenobiotics Biodegradation and Metabolism:Drug metabolism - other enzymes	3688	1361	6713	6154	4008	11643	10438	8021	3219	4443	9002	2830	71520		Metabolism:Xenobiotics Biodegradation and Metabolism:Drug metabolism - other enzymes	0.10638	0.0113167	1		0.401384	0.161109	0.251509	1		-0.332185	0.110347	0.292481	1		0.139902	1	6325.5	5594.5
Metabolism:Biosynthesis of Other Secondary Metabolites:Streptomycin biosynthesis	4574	1563	7021	6128	4424	12195	8850	6410	3291	3079	3830	4373	65738		Metabolism:Biosynthesis of Other Secondary Metabolites:Streptomycin biosynthesis	0.338497	0.11458	1		0.323792	0.104841	0.297528	1		-0.849949	0.722414	0.0340908	1		0.345923	1	4972.17	5984.17
Unclassified:Cellular Processes and Signaling:Cell motility and secretion	3447	1101	5582	4320	2959	11449	13157	9630	3200	2391	2599	4637	64472		Unclassified:Cellular Processes and Signaling:Cell motility and secretion	0.0820785	0.00673688	1		0.213318	0.0455045	0.365235	1		-0.912117	0.831957	0.0154295	1		0.233901	1	5935.67	4809.67
Metabolism:Carbohydrate Metabolism:Ascorbate and aldarate metabolism	2913	1049	5287	4823	3006	7456	14847	12796	1945	2516	4547	2730	63915		Metabolism:Carbohydrate Metabolism:Ascorbate and aldarate metabolism	-0.226922	0.0514938	1		0.369206	0.136313	0.270411	1		-0.807337	0.651792	0.0492647	1		0.971706	1	6563.5	4089
Cellular Processes:Cell Motility:Cytoskeleton proteins	3528	1256	6235	5503	3600	10551	6607	4653	3670	5072	10126	2472	63273		Cellular Processes:Cell Motility:Cytoskeleton proteins	0.234926	0.0551901	1		0.356585	0.127153	0.277898	1		0.467035	0.218121	0.21387	1		0.0357006	1	5433.33	5112.17
Metabolism:Lipid Metabolism:Biosynthesis of unsaturated fatty acids	2748	1049	5665	4712	2806	9066	14490	10359	1920	2161	2446	3159	60581		Metabolism:Lipid Metabolism:Biosynthesis of unsaturated fatty acids	-0.0959868	0.00921346	1		0.329461	0.108545	0.294117	1		-0.879634	0.773757	0.0246069	1		0.328592	1	5755.83	4341
Metabolism:Amino Acid Metabolism:Phenylalanine metabolism	2561	906	4549	3623	2120	7797	15287	10146	2384	2456	3592	3919	59340		Metabolism:Amino Acid Metabolism:Phenylalanine metabolism	-0.143223	0.0205129	1		0.207355	0.0429961	0.368946	1		-0.855825	0.732437	0.0321377	1		1.30851	1	6297.33	3592.67
Metabolism:Xenobiotics Biodegradation and Metabolism:Chloroalkane and chloroalkene degradation	3344	1213	6863	5960	3431	10826	7799	5453	2481	2688	4718	2750	57526		Metabolism:Xenobiotics Biodegradation and Metabolism:Chloroalkane and chloroalkene degradation	0.275604	0.0759573	1		0.3443	0.118543	0.285223	1		-0.645645	0.416857	0.11965	1		0.346374	1	4314.83	5272.83
Metabolism:Xenobiotics Biodegradation and Metabolism:Aminobenzoate degradation	3028	1299	7416	6683	3306	11147	9649	5594	1361	1470	1414	3295	55662		Metabolism:Xenobiotics Biodegradation and Metabolism:Aminobenzoate degradation	0.247612	0.0613117	1		0.361568	0.130731	0.274937	1		-0.882537	0.778871	0.023733	1		0.706168	1	3797.17	5479.83
Metabolism:Metabolism of Terpenoids and Polyketides:Tetracycline biosynthesis	3005	1081	5708	4957	3261	11320	6513	4338	2265	2705	4645	2133	51931		Metabolism:Metabolism of Terpenoids and Polyketides:Tetracycline biosynthesis	0.361163	0.130438	1		0.38339	0.146988	0.262045	1		-0.500896	0.250897	0.195007	1		0.487926	1	3766.5	4888.67
Metabolism:Metabolism of Terpenoids and Polyketides:Limonene and pinene degradation	2169	938	6482	5404	2226	7720	11152	6311	1475	1893	2428	2903	51101		Metabolism:Metabolism of Terpenoids and Polyketides:Limonene and pinene degradation	-0.000314604	9.89755e-08	1		0.305604	0.0933935	0.308519	1		-0.840665	0.706718	0.0372484	1		0.0115517	1	4360.33	4156.5
Metabolism:Xenobiotics Biodegradation and Metabolism:Naphthalene degradation	2791	1065	6059	5630	3003	8938	7509	5274	1625	2244	3602	2226	49966		Metabolism:Xenobiotics Biodegradation and Metabolism:Naphthalene degradation	0.194817	0.0379535	1		0.376653	0.141867	0.266012	1		-0.71807	0.515624	0.0859486	1		0.316868	1	3746.67	4581
Unclassified:Metabolism:Metabolism of cofactors and vitamins	2101	666	4459	3254	1880	7026	11144	7948	2112	2196	3534	2773	49093		Unclassified:Metabolism:Metabolism of cofactors and vitamins	-0.100032	0.0100065	1		0.23542	0.0554227	0.351523	1		-0.82871	0.68676	0.0414398	1		0.931191	1	4951.17	3231
None	2374	758	4777	3571	2107	5970	8619	6636	2594	2962	4672	2708	47748		None	-0.104561	0.0109331	1		0.236317	0.0558457	0.350968	1		-0.720515	0.519142	0.084867	1		1.27696	1	4698.5	3259.5
Metabolism:Metabolism of Cofactors and Vitamins:Vitamin B6 metabolism	2479	936	4724	4104	2710	7208	9805	7330	1549	1952	2466	2434	47697		Metabolism:Metabolism of Cofactors and Vitamins:Vitamin B6 metabolism	-0.0411305	0.00169172	1		0.386823	0.149632	0.260028	1		-0.851965	0.725844	0.0334168	1		0.114324	1	4256	3693.5
Metabolism:Metabolism of Other Amino Acids:Cyanoamino acid metabolism	2272	849	3490	3811	2422	8437	7834	5208	1781	3269	5702	2277	47352		Metabolism:Metabolism of Other Amino Acids:Cyanoamino acid metabolism	0.155595	0.0242097	1		0.441496	0.194918	0.228353	1		-0.421719	0.177847	0.239711	1		0.313838	1	4345.17	3546.83
Metabolism:Metabolism of Terpenoids and Polyketides:Geraniol degradation	1499	833	5636	4704	1770	6333	12404	7585	370	967	174	2559	44834		Metabolism:Metabolism of Terpenoids and Polyketides:Geraniol degradation	-0.100406	0.0100813	1		0.32665	0.1067	0.295808	1		-0.896981	0.804575	0.0195367	1		0.0596329	1	4009.83	3462.5
Genetic Information Processing:Transcription:RNA polymerase	2763	1005	4771	4411	2997	8611	5123	3515	2022	2545	4584	1752	44099		Genetic Information Processing:Transcription:RNA polymerase	0.334788	0.112083	1		0.408714	0.167047	0.247242	1		-0.246743	0.0608822	0.344527	1		0.486827	1	3256.83	4093
Cellular Processes:Transport and Catabolism:Peroxisome	1982	843	5150	3924	2013	6762	8018	4705	1676	1718	2414	2984	42189		Cellular Processes:Transport and Catabolism:Peroxisome	0.12209	0.014906	1		0.288086	0.0829936	0.319168	1		-0.828805	0.686918	0.0414058	1		0.010742	1	3585.83	3445.67
Unclassified:Genetic Information Processing:Others	1771	660	3322	3215	2046	5852	9286	7257	1133	1983	3421	1137	41083		Unclassified:Genetic Information Processing:Others	-0.167206	0.0279579	1		0.445007	0.198032	0.226349	1		-0.76601	0.586771	0.0654994	1		0.597802	1	4036.17	2811
Metabolism:Metabolism of Other Amino Acids:D-Alanine metabolism	2748	1019	4854	4544	3128	8164	4496	3403	1375	1700	3387	1134	39952		Metabolism:Metabolism of Other Amino Acids:D-Alanine metabolism	0.312661	0.0977568	1		0.439837	0.193457	0.229301	1		-0.475521	0.22612	0.209105	1		1.72234	1	2582.5	4076.17
Metabolism:Metabolism of Cofactors and Vitamins:Biotin metabolism	2215	739	3690	3078	2189	5958	7709	5348	1656	1599	2435	2312	38928		Metabolism:Metabolism of Cofactors and Vitamins:Biotin metabolism	0.00530795	2.81743e-05	1		0.324737	0.105454	0.29696	1		-0.84001	0.705617	0.0374744	1		0.183135	1	3509.83	2978.17
Metabolism:Carbohydrate Metabolism:Inositol phosphate metabolism	1732	711	4248	3364	1902	5535	8875	7353	816	1044	1287	1659	38526		Metabolism:Carbohydrate Metabolism:Inositol phosphate metabolism	-0.126244	0.0159375	1		0.336931	0.113523	0.289633	1		-0.868719	0.754673	0.027981	1		0.128462	1	3505.67	2915.33
Unclassified:Metabolism:Lipid metabolism	1645	579	2958	2758	1721	5429	7542	6843	1478	1844	3420	1985	38202		Unclassified:Metabolism:Lipid metabolism	-0.086757	0.00752677	1		0.383606	0.147153	0.261918	1		-0.743571	0.552898	0.0748688	1		1.07718	1	3852	2515
Unclassified:Genetic Information Processing:Restriction enzyme	2671	986	3921	3955	2977	7806	4660	1734	1577	2302	3523	1948	38060		Unclassified:Genetic Information Processing:Restriction enzyme	0.43765	0.191538	1		0.467109	0.218191	0.213828	1		-0.206065	0.0424627	0.369749	1		1.08019	1	2624	3719.33
Metabolism:Metabolism of Terpenoids and Polyketides:Polyketide sugar unit biosynthesis	2775	926	4212	3572	2607	6892	5080	3524	2058	1712	1498	2890	37746		Metabolism:Metabolism of Terpenoids and Polyketides:Polyketide sugar unit biosynthesis	0.36227	0.13124	1		0.294853	0.0869385	0.315047	1		-0.938427	0.880645	0.00908525	1		0.510001	1	2793.67	3497.33
Metabolism:Metabolism of Other Amino Acids:D-Glutamine and D-glutamate metabolism	2065	713	3417	3086	2065	6254	5501	3880	1973	2220	4526	1856	37556		Metabolism:Metabolism of Other Amino Acids:D-Glutamine and D-glutamate metabolism	0.163342	0.0266805	1		0.354149	0.125422	0.279347	1		-0.378447	0.143222	0.264954	1		0.157258	1	3326	2933.33
Unclassified:Metabolism:Carbohydrate metabolism	1000	337	2205	1750	935	3300	11369	9484	1167	1167	2283	2094	37091		Unclassified:Metabolism:Carbohydrate metabolism	-0.293418	0.0860938	1		0.276236	0.0763063	0.326406	1		-0.848797	0.720456	0.034478	1		2.452	1	4594	1587.83
Genetic Information Processing:Translation:RNA transport	2246	795	3853	3600	2392	7064	5711	4061	1278	1976	2456	1399	36831		Genetic Information Processing:Translation:RNA transport	0.186607	0.0348222	1		0.400021	0.160016	0.252304	1		-0.761527	0.579924	0.0673414	1		0.207044	1	2813.5	3325
Metabolism:Xenobiotics Biodegradation and Metabolism:Toluene degradation	1414	529	2828	2297	1378	4554	10204	7866	709	724	182	2025	34710		Metabolism:Xenobiotics Biodegradation and Metabolism:Toluene degradation	-0.183341	0.0336141	1		0.300522	0.0903133	0.311602	1		-0.908445	0.825272	0.0163972	1		0.616022	1	3618.33	2166.67
Metabolism:Biosynthesis of Other Secondary Metabolites:Novobiocin biosynthesis	1917	603	3067	2501	1642	4929	5751	3944	1906	1974	3483	2047	33764		Metabolism:Biosynthesis of Other Secondary Metabolites:Novobiocin biosynthesis	0.0377521	0.00142522	1		0.229115	0.0524936	0.355427	1		-0.647536	0.419303	0.118731	1		0.731346	1	3184.17	2443.17
Metabolism:Xenobiotics Biodegradation and Metabolism:Caprolactam degradation	1142	544	3361	2896	1190	4578	9539	6006	503	688	130	2005	32582		Metabolism:Xenobiotics Biodegradation and Metabolism:Caprolactam degradation	-0.124407	0.0154772	1		0.315589	0.0995962	0.302477	1		-0.906348	0.821467	0.0169583	1		0.261648	1	3145.17	2285.17
Metabolism:Biosynthesis of Other Secondary Metabolites:Tropane, piperidine and pyridine alkaloid biosynthesis	1463	476	2863	2220	1257	3739	6671	4999	1693	1628	3400	1861	32270		Metabolism:Biosynthesis of Other Secondary Metabolites:Tropane, piperidine and pyridine alkaloid biosynthesis	-0.170798	0.029172	1		0.229662	0.0527447	0.355088	1		-0.720624	0.5193	0.0848189	1		1.97168	1	3375.33	2003
Unclassified:Metabolism:Nucleotide metabolism	1066	359	1694	1734	1215	3699	9397	8256	597	1120	2231	784	32152		Unclassified:Metabolism:Nucleotide metabolism	-0.288187	0.0830517	1		0.472492	0.223248	0.210803	1		-0.812968	0.660917	0.0471631	1		1.53288	1	3730.83	1627.83
Metabolism:Metabolism of Other Amino Acids:Taurine and hypotaurine metabolism	1646	637	2571	2668	1860	5672	5572	3776	889	1572	2348	1296	30507		Metabolism:Metabolism of Other Amino Acids:Taurine and hypotaurine metabolism	0.119226	0.0142149	1		0.473361	0.22407	0.210316	1		-0.731336	0.534853	0.0801293	1		0.00432643	1	2575.5	2509
Metabolism:Xenobiotics Biodegradation and Metabolism:Nitrotoluene degradation	1538	399	2121	1384	1130	3914	6503	5231	1923	1415	2404	2092	30054		Metabolism:Xenobiotics Biodegradation and Metabolism:Nitrotoluene degradation	-0.133276	0.0177624	1		0.0425515	0.00181063	0.472919	1		-0.848466	0.719895	0.0345893	1		2.37844	1	3261.33	1747.67
Environmental Information Processing:Signal Transduction:Phosphatidylinositol signaling system	1794	648	3079	2807	1891	5652	4515	2943	1208	1446	2328	1386	29697		Environmental Information Processing:Signal Transduction:Phosphatidylinositol signaling system	0.237674	0.056489	1		0.387453	0.15012	0.259658	1		-0.698458	0.487843	0.0947622	1		0.154103	1	2304.33	2645.17
Environmental Information Processing:Signaling Molecules and Interaction:Bacterial toxins	1222	467	2276	2265	1384	3934	4111	3019	1389	2468	5499	780	28814		Environmental Information Processing:Signaling Molecules and Interaction:Bacterial toxins	-0.030626	0.000937949	1		0.438423	0.192215	0.23011	1		0.223436	0.0499237	0.358949	1		1.21721	1	2877.67	1924.67
Metabolism:Xenobiotics Biodegradation and Metabolism:Polycyclic aromatic hydrocarbon degradation	1984	829	3616	3744	2335	7123	1425	587	1148	1597	3357	1067	28812		Metabolism:Xenobiotics Biodegradation and Metabolism:Polycyclic aromatic hydrocarbon degradation	0.546693	0.298873	1		0.471746	0.222544	0.211222	1		0.739372	0.54667	0.0766626	1		3.21796	1	1530.17	3271.83
Unclassified:Metabolism:Biosynthesis and biodegradation of secondary metabolites	984	362	2010	1765	1091	3310	9017	7215	480	455	104	1592	28385		Unclassified:Metabolism:Biosynthesis and biodegradation of secondary metabolites	-0.226877	0.0514733	1		0.389089	0.15139	0.258698	1		-0.902865	0.815165	0.0179035	1		0.883147	1	3143.83	1587
Metabolism:Metabolism of Terpenoids and Polyketides:Biosynthesis of siderophore group nonribosomal peptides	1146	445	2318	2190	1401	3570	6852	6973	276	485	61	997	26714		Metabolism:Metabolism of Terpenoids and Polyketides:Biosynthesis of siderophore group nonribosomal peptides	-0.195446	0.0381992	1		0.460937	0.212463	0.217308	1		-0.871943	0.760284	0.0269704	1		0.280945	1	2607.33	1845
Metabolism:Lipid Metabolism:Sphingolipid metabolism	1700	557	2338	2045	1630	4643	2381	1576	1808	1612	3377	2688	26355		Metabolism:Lipid Metabolism:Sphingolipid metabolism	0.635127	0.403386	1		0.315384	0.0994672	0.3026	1		0.423349	0.179224	0.23877	1		0.0197507	1	2240.33	2152.17
Metabolism:Xenobiotics Biodegradation and Metabolism:Dioxin degradation	1457	516	2181	2387	1597	4152	4769	3656	622	1226	2261	654	25478		Metabolism:Xenobiotics Biodegradation and Metabolism:Dioxin degradation	-0.0370372	0.00137176	1		0.464044	0.215337	0.215555	1		-0.688632	0.474214	0.0992685	1		0.0305298	1	2198	2048.33
Metabolism:Xenobiotics Biodegradation and Metabolism:Drug metabolism - cytochrome P450	1323	506	2333	2256	1255	4698	6380	4041	512	463	135	1434	25336		Metabolism:Xenobiotics Biodegradation and Metabolism:Drug metabolism - cytochrome P450	0.0128225	0.000164416	1		0.333737	0.11138	0.291549	1		-0.913544	0.834563	0.0150585	1		0.00695961	1	2160.83	2061.83
Metabolism:Xenobiotics Biodegradation and Metabolism:Metabolism of xenobiotics by cytochrome P450	1297	495	2278	2204	1239	4641	6347	4029	495	433	133	1428	25019		Metabolism:Xenobiotics Biodegradation and Metabolism:Metabolism of xenobiotics by cytochrome P450	0.0113753	0.000129397	1		0.338079	0.114297	0.288946	1		-0.912956	0.833489	0.0152109	1		0.0100661	1	2144.17	2025.67
Metabolism:Glycan Biosynthesis and Metabolism:Other glycan degradation	1059	390	1348	1607	1141	3321	3615	3018	880	1551	3363	2609	23902		Metabolism:Glycan Biosynthesis and Metabolism:Other glycan degradation	0.258519	0.0668322	1		0.480625	0.231	0.206251	1		-0.259247	0.0672088	0.336826	1		2.96596	1	2506	1477.67
Metabolism:Metabolism of Terpenoids and Polyketides:Biosynthesis of ansamycins	1023	300	1542	1273	883	2446	3285	2542	1423	1701	3408	1207	21033		Metabolism:Metabolism of Terpenoids and Polyketides:Biosynthesis of ansamycins	-0.0857386	0.00735111	1		0.234623	0.0550477	0.352017	1		-0.104582	0.0109375	0.433542	1		4.32051	1	2261	1244.5
Unclassified:Metabolism:Glycan biosynthesis and metabolism	433	131	644	575	372	1531	7274	6235	490	779	1152	967	20583		Unclassified:Metabolism:Glycan biosynthesis and metabolism	-0.338947	0.114885	1		0.25489	0.064969	0.339506	1		-0.851519	0.725085	0.0335655	1		3.00013	1	2816.17	614.333
Metabolism:Biosynthesis of Other Secondary Metabolites:Phenylpropanoid biosynthesis	933	345	1451	1540	983	3381	3599	2681	808	1245	2276	1225	20467		Metabolism:Biosynthesis of Other Secondary Metabolites:Phenylpropanoid biosynthesis	0.105198	0.0110665	1		0.427856	0.183061	0.236173	1		-0.576507	0.33236	0.154472	1		0.76744	1	1972.33	1438.83
Metabolism:Xenobiotics Biodegradation and Metabolism:Xylene degradation	1021	336	1416	1589	1051	2577	4221	3205	591	1137	2247	436	19827		Metabolism:Xenobiotics Biodegradation and Metabolism:Xylene degradation	-0.211287	0.0446423	1		0.430596	0.185413	0.234598	1		-0.641915	0.412055	0.121467	1		0.855947	1	1972.83	1331.67
Metabolism:Lipid Metabolism:Synthesis and degradation of ketone bodies	1082	503	2773	2443	1163	3599	2889	992	422	791	1205	783	18645		Metabolism:Lipid Metabolism:Synthesis and degradation of ketone bodies	0.264327	0.0698685	1		0.3433	0.117855	0.285821	1		-0.590689	0.348913	0.147141	1		1.52906	1	1180.33	1927.17
Metabolism:Metabolism of Cofactors and Vitamins:Lipoic acid metabolism	980	331	1890	1456	877	2275	3434	2427	867	818	1176	1176	17707		Metabolism:Metabolism of Cofactors and Vitamins:Lipoic acid metabolism	-0.0643399	0.00413962	1		0.24508	0.0600643	0.345553	1		-0.843579	0.711626	0.0362479	1		0.44983	1	1649.67	1301.5
Genetic Information Processing:Folding, Sorting and Degradation:Protein processing in endoplasmic reticulum	1280	344	1762	1125	887	3458	1634	999	1631	825	1227	1894	17066		Genetic Information Processing:Folding, Sorting and Degradation:Protein processing in endoplasmic reticulum	0.61809	0.382035	1		-0.00151718	2.30183e-06	0.499034	1		-0.42679	0.18215	0.236787	1		0.0521574	1	1368.33	1476
Metabolism:Xenobiotics Biodegradation and Metabolism:Bisphenol degradation	899	381	2262	2121	1092	3937	1831	911	605	845	1197	806	16887		Metabolism:Xenobiotics Biodegradation and Metabolism:Bisphenol degradation	0.468042	0.219064	1		0.414156	0.171525	0.244084	1		-0.447894	0.200609	0.224705	1		1.84048	1	1032.5	1782
Unclassified:Cellular Processes and Signaling:Electron transfer carriers	252	70	497	419	267	686	6270	5793	264	612	1104	516	16750		Unclassified:Cellular Processes and Signaling:Electron transfer carriers	-0.401094	0.160876	1		0.362587	0.13147	0.274332	1		-0.828098	0.685746	0.041658	1		3.21038	1	2426.5	365.167
Metabolism:Metabolism of Cofactors and Vitamins:Retinol metabolism	1016	348	1821	1600	943	3171	3241	2391	635	298	107	1125	16696		Metabolism:Metabolism of Cofactors and Vitamins:Retinol metabolism	0.137333	0.0188603	1		0.300276	0.0901657	0.311751	1		-0.945405	0.893791	0.00759344	1		0.0801076	1	1299.5	1483.17
Metabolism:Xenobiotics Biodegradation and Metabolism:Ethylbenzene degradation	703	258	1969	1675	777	2441	2998	2155	534	786	1197	654	16147		Metabolism:Xenobiotics Biodegradation and Metabolism:Ethylbenzene degradation	-0.0154351	0.000238243	1		0.345322	0.119247	0.284612	1		-0.766858	0.588072	0.0651523	1		0.0247447	1	1387.33	1303.83
Unclassified:Cellular Processes and Signaling:Cell division	597	168	976	728	408	1732	4157	3199	695	987	1212	1050	15909		Unclassified:Cellular Processes and Signaling:Cell division	-0.229702	0.0527629	1		0.0935821	0.00875761	0.440511	1		-0.834421	0.696258	0.0394204	1		3.174	1	1883.33	768.167
Metabolism:Metabolism of Other Amino Acids:Phosphonate and phosphinate metabolism	755	303	1751	1548	841	2278	3130	2133	362	812	1186	584	15683		Metabolism:Metabolism of Other Amino Acids:Phosphonate and phosphinate metabolism	-0.0668663	0.0044711	1		0.375033	0.14065	0.266968	1		-0.742512	0.551324	0.0753199	1		0.0532374	1	1367.83	1246
Environmental Information Processing:Signaling Molecules and Interaction:Ion channels	913	340	1465	1489	1097	3239	1962	1612	500	407	1144	471	14639		Environmental Information Processing:Signaling Molecules and Interaction:Ion channels	0.296377	0.0878395	1		0.508659	0.258734	0.190741	1		-0.661548	0.437646	0.111987	1		0.70839	1	1016	1423.83
Metabolism:Biosynthesis of Other Secondary Metabolites:Isoquinoline alkaloid biosynthesis	674	162	1013	648	404	1429	3134	2172	916	729	1203	1127	13611		Metabolism:Biosynthesis of Other Secondary Metabolites:Isoquinoline alkaloid biosynthesis	-0.18327	0.033588	1		-0.0267784	0.000717081	0.482954	1		-0.832604	0.693229	0.0400596	1		3.87003	1	1546.83	721.667
Metabolism:Lipid Metabolism:Arachidonic acid metabolism	630	278	1343	1269	733	2079	2761	1721	346	732	1138	439	13469		Metabolism:Lipid Metabolism:Arachidonic acid metabolism	-0.0515203	0.00265434	1		0.421134	0.177354	0.240048	1		-0.709498	0.503388	0.0897704	1		0.085661	1	1189.5	1055.33
Metabolism:Metabolism of Terpenoids and Polyketides:Biosynthesis of vancomycin group antibiotics	847	273	1348	1042	744	2042	1705	1299	878	664	1178	1018	13038		Metabolism:Metabolism of Terpenoids and Polyketides:Biosynthesis of vancomycin group antibiotics	0.295431	0.0872797	1		0.224476	0.0503894	0.358304	1		-0.667086	0.445004	0.109352	1		0.0672207	1	1123.67	1049.33
Genetic Information Processing:Translation:Ribosome biogenesis in eukaryotes	692	253	1162	1079	696	2196	2323	1345	512	682	1156	557	12653		Genetic Information Processing:Translation:Ribosome biogenesis in eukaryotes	0.0905211	0.00819406	1		0.363024	0.131787	0.274073	1		-0.665886	0.443404	0.109922	1		0.0449309	1	1095.83	1013
Metabolism:Lipid Metabolism:Linoleic acid metabolism	718	295	1546	1443	871	3218	812	177	561	728	1173	597	12139		Metabolism:Lipid Metabolism:Linoleic acid metabolism	0.585717	0.343064	1		0.441554	0.19497	0.22832	1		0.553255	0.306091	0.166687	1		2.34247	1	674.667	1348.5
Metabolism:Metabolism of Terpenoids and Polyketides:Zeatin biosynthesis	603	215	1021	929	629	1846	1281	883	500	623	1143	516	10189		Metabolism:Metabolism of Terpenoids and Polyketides:Zeatin biosynthesis	0.306975	0.0942336	1		0.381555	0.145584	0.263124	1		-0.255456	0.0652578	0.339158	1		0.0351459	1	824.333	873.833
Metabolism:Biosynthesis of Other Secondary Metabolites:Butirosin and neomycin biosynthesis	715	244	1142	950	678	1941	579	544	706	642	1161	736	10038		Metabolism:Biosynthesis of Other Secondary Metabolites:Butirosin and neomycin biosynthesis	0.602671	0.363212	1		0.295954	0.087589	0.314377	1		0.795912	0.633477	0.0536124	1		0.744321	1	728	945
Unclassified:Genetic Information Processing:Transcription related proteins	283	64	318	343	250	971	3292	3031	200	98	40	427	9317		Unclassified:Genetic Information Processing:Transcription related proteins	-0.286907	0.0823155	1		0.304456	0.0926935	0.309215	1		-0.891647	0.795035	0.021056	1		1.59122	1	1181.33	371.5
Metabolism:Glycan Biosynthesis and Metabolism:Glycosphingolipid biosynthesis - globo series	435	179	597	686	489	1269	1255	890	319	681	1135	942	8877		Metabolism:Glycan Biosynthesis and Metabolism:Glycosphingolipid biosynthesis - globo series	0.360826	0.130195	1		0.504178	0.254196	0.193201	1		-0.190215	0.0361816	0.37964	1		1.65741	1	870.333	609.167
Metabolism:Xenobiotics Biodegradation and Metabolism:Atrazine degradation	452	164	1311	888	385	1453	1557	1197	433	175	45	782	8842		Metabolism:Xenobiotics Biodegradation and Metabolism:Atrazine degradation	0.155634	0.0242218	1		0.203728	0.0415052	0.371205	1		-0.965617	0.932416	0.00380691	0.822291		0.0568916	1	698.167	775.5
Metabolism:Xenobiotics Biodegradation and Metabolism:Chlorocyclohexane and chlorobenzene degradation	337	142	816	750	335	1609	1889	1816	57	124	35	347	8257		Metabolism:Xenobiotics Biodegradation and Metabolism:Chlorocyclohexane and chlorobenzene degradation	-0.00917436	8.41688e-05	1		0.326876	0.106848	0.295672	1		-0.87471	0.765118	0.0261122	1		0.0120535	1	711.333	664.833
Cellular Processes:Transport and Catabolism:Lysosome	386	103	481	323	211	734	1103	898	641	546	1127	1593	8146		Cellular Processes:Transport and Catabolism:Lysosome	0.327306	0.107129	1		-0.139045	0.0193336	0.411767	1		-0.182231	0.033208	0.384634	1		11.617	1	984.667	373
Metabolism:Lipid Metabolism:alpha-Linolenic acid metabolism	156	93	710	533	219	682	2887	2333	23	159	23	298	8116		Metabolism:Lipid Metabolism:alpha-Linolenic acid metabolism	-0.316691	0.100293	1		0.336078	0.112948	0.290145	1		-0.888041	0.788616	0.0221036	1		1.04843	1	953.833	398.833
Environmental Information Processing:Signaling Molecules and Interaction:Cellular antigens	334	148	686	633	286	1047	1888	964	70	450	90	556	7152		Environmental Information Processing:Signaling Molecules and Interaction:Cellular antigens	-0.0328046	0.00107614	1		0.265033	0.0702423	0.333272	1		-0.854721	0.730548	0.032502	1		0.226626	1	669.667	522.333
Metabolism:Xenobiotics Biodegradation and Metabolism:Styrene degradation	340	149	689	654	344	1478	1913	548	74	247	68	399	6903		Metabolism:Xenobiotics Biodegradation and Metabolism:Styrene degradation	0.117963	0.0139153	1		0.35268	0.124383	0.280222	1		-0.813562	0.661882	0.0469432	1		0.0385185	1	541.5	609
Unclassified:Cellular Processes and Signaling:Germination	250	185	3350	1870	522	69	44	39	34	90	12	16	6481		Unclassified:Cellular Processes and Signaling:Germination	-0.0307055	0.000942828	1		0.258114	0.066623	0.337523	1		-0.0719474	0.00517643	0.454236	1		3.50313	1	39.1667	1041
Environmental Information Processing:Signal Transduction:MAPK signaling pathway - yeast	251	81	551	576	245	896	930	534	300	616	1129	318	6427		Environmental Information Processing:Signal Transduction:MAPK signaling pathway - yeast	0.0823421	0.00678022	1		0.35584	0.126622	0.278341	1		0.231064	0.0533906	0.35422	1		1.2604	1	637.833	433.333
Genetic Information Processing:Folding, Sorting and Degradation:Proteasome	230	71	319	233	145	584	1200	868	470	563	1124	504	6311		Genetic Information Processing:Folding, Sorting and Degradation:Proteasome	-0.154867	0.0239837	1		-0.0133677	0.000178695	0.49149	1		-0.221797	0.0491937	0.359966	1		12.1297	1	788.167	263.667
Metabolism:Glycan Biosynthesis and Metabolism:Glycosaminoglycan degradation	208	55	259	212	110	416	944	850	434	434	1089	1141	6152		Metabolism:Glycan Biosynthesis and Metabolism:Glycosaminoglycan degradation	0.147064	0.0216279	1		-0.0737732	0.00544248	0.453077	1		-0.0661996	0.00438238	0.457887	1		19.3397	0.293435	815.333	210
Metabolism:Xenobiotics Biodegradation and Metabolism:Fluorobenzoate degradation	187	82	360	422	198	799	1751	1486	25	111	6	295	5722		Metabolism:Xenobiotics Biodegradation and Metabolism:Fluorobenzoate degradation	-0.179377	0.0321759	1		0.413665	0.171119	0.244369	1		-0.887683	0.787982	0.0222082	1		0.638169	1	612.333	341.333
Metabolism:Biosynthesis of Other Secondary Metabolites:Penicillin and cephalosporin biosynthesis	237	138	756	654	272	795	1254	816	46	95	42	319	5424		Metabolism:Biosynthesis of Other Secondary Metabolites:Penicillin and cephalosporin biosynthesis	-0.0269867	0.000728283	1		0.337094	0.113632	0.289536	1		-0.894537	0.800196	0.0202285	1		0.0389973	1	428.667	475.333
Metabolism:Glycan Biosynthesis and Metabolism:N-Glycan biosynthesis	495	122	677	282	251	1007	344	137	763	150	68	989	5285		Metabolism:Glycan Biosynthesis and Metabolism:N-Glycan biosynthesis	0.63046	0.39748	1		-0.235991	0.0556919	0.35117	1		-0.301825	0.0910983	0.310811	1		0.0970547	1	408.5	472.333
Metabolism:Lipid Metabolism:Steroid hormone biosynthesis	386	87	542	291	208	847	407	138	564	133	48	952	4603		Metabolism:Lipid Metabolism:Steroid hormone biosynthesis	0.665461	0.442838	1		-0.138852	0.0192799	0.411889	1		-0.524572	0.275176	0.182067	1		0.0123188	1	373.667	393.5
Genetic Information Processing:Folding, Sorting and Degradation:Ubiquitin system	184	68	462	291	156	659	1178	799	205	106	22	407	4537		Genetic Information Processing:Folding, Sorting and Degradation:Ubiquitin system	-0.0484789	0.0023502	1		0.174721	0.0305276	0.389337	1		-0.944329	0.891757	0.00781783	1		0.532874	1	452.833	303.333
Metabolism:Lipid Metabolism:Primary bile acid biosynthesis	129	59	395	428	182	686	463	50	245	304	1083	253	4277		Metabolism:Lipid Metabolism:Primary bile acid biosynthesis	0.274306	0.0752436	1		0.457482	0.20929	0.219263	1		0.599042	0.358852	0.142866	1		0.243347	1	399.667	313.167
Metabolism:Biosynthesis of Other Secondary Metabolites:beta-Lactam resistance	191	86	435	410	189	578	1085	805	33	51	40	239	4142		Metabolism:Biosynthesis of Other Secondary Metabolites:beta-Lactam resistance	-0.115381	0.0133128	1		0.331506	0.109896	0.292889	1		-0.890796	0.793518	0.0213017	1		0.0906553	1	375.5	314.833
Genetic Information Processing:Replication and Repair:Non-homologous end-joining	291	117	996	597	223	546	256	40	208	111	24	335	3744		Genetic Information Processing:Replication and Repair:Non-homologous end-joining	0.295551	0.0873504	1		0.152732	0.0233271	0.403147	1		-0.609081	0.370979	0.137774	1		4.53113	1	162.333	461.667
Metabolism:Lipid Metabolism:Secondary bile acid biosynthesis	96	39	317	320	136	482	304	44	240	298	1077	180	3533		Metabolism:Lipid Metabolism:Secondary bile acid biosynthesis	0.178909	0.0320086	1		0.440279	0.193846	0.229049	1		0.717131	0.514277	0.086365	1		0.583266	1	357.167	231.667
Metabolism:Lipid Metabolism:Steroid biosynthesis	249	67	526	253	154	492	155	37	371	77	25	440	2846		Metabolism:Lipid Metabolism:Steroid biosynthesis	0.55023	0.302753	1		-0.00366848	1.34577e-05	0.497665	1		-0.244227	0.059647	0.34608	1		1.02938	1	184.167	290.167
Metabolism:Biosynthesis of Other Secondary Metabolites:Flavonoid biosynthesis	194	71	617	395	182	351	97	29	198	49	29	251	2463		Metabolism:Biosynthesis of Other Secondary Metabolites:Flavonoid biosynthesis	0.366555	0.134362	1		0.219512	0.0481853	0.361385	1		-0.256985	0.0660411	0.338218	1		4.76059	1	108.833	301.667
Metabolism:Glycan Biosynthesis and Metabolism:Glycosphingolipid biosynthesis - ganglio series	54	19	61	74	29	84	389	417	15	125	24	663	1954		Metabolism:Glycan Biosynthesis and Metabolism:Glycosphingolipid biosynthesis - ganglio series	0.249611	0.0623054	1		0.0346588	0.00120123	0.47794	1		-0.82501	0.680641	0.0427646	1		4.21955	1	272.167	53.5
Metabolism:Biosynthesis of Other Secondary Metabolites:Stilbenoid, diarylheptanoid and gingerol biosynthesis	66	50	511	397	117	102	31	14	5	69	18	102	1482		Metabolism:Biosynthesis of Other Secondary Metabolites:Stilbenoid, diarylheptanoid and gingerol biosynthesis	0.147818	0.0218502	1		0.335693	0.11269	0.290376	1		0.18293	0.0334633	0.384196	1		4.21436	1	39.8333	207.167
Cellular Processes:Cell Growth and Death:Apoptosis	74	27	100	111	55	572	225	15	16	19	11	23	1248		Cellular Processes:Cell Growth and Death:Apoptosis	0.460986	0.212508	1		0.214169	0.0458684	0.364705	1		-0.71436	0.51031	0.087597	1		1.33375	1	51.5	156.5
Metabolism:Biosynthesis of Other Secondary Metabolites:Flavone and flavonol biosynthesis	25	14	38	59	25	92	473	391	1	38	2	56	1214		Metabolism:Biosynthesis of Other Secondary Metabolites:Flavone and flavonol biosynthesis	-0.325617	0.106026	1		0.41307	0.170627	0.244714	1		-0.884719	0.782728	0.0230826	1		1.80486	1	160.167	42.1667
Metabolism:Metabolism of Other Amino Acids:D-Arginine and D-ornithine metabolism	50	24	274	167	56	407	29	6	11	17	3	10	1054		Metabolism:Metabolism of Other Amino Acids:D-Arginine and D-ornithine metabolism	0.486468	0.236651	1		0.233754	0.054641	0.352554	1		-0.629059	0.395716	0.127785	1		5.85266	1	12.6667	163
Metabolism:Metabolism of Terpenoids and Polyketides:Carotenoid biosynthesis	115	48	115	100	47	209	45	18	22	41	22	52	834		Metabolism:Metabolism of Terpenoids and Polyketides:Carotenoid biosynthesis	0.476273	0.226836	1		-0.381897	0.145845	0.262923	1		-0.292762	0.0857097	0.31632	1		8.39975	1	33.3333	105.667
Metabolism:Lipid Metabolism:Ether lipid metabolism	36	35	78	74	33	168	246	25	11	8	18	55	787		Metabolism:Lipid Metabolism:Ether lipid metabolism	0.121143	0.0146757	1		0.229766	0.0527923	0.355024	1		-0.724041	0.524235	0.0833147	1		0.0552292	1	60.5	70.6667
Cellular Processes:Cell Growth and Death:Meiosis - yeast	69	38	137	71	79	138	54	18	14	18	7	49	692		Cellular Processes:Cell Growth and Death:Meiosis - yeast	0.435559	0.189712	1		0.232224	0.053928	0.353501	1		-0.810586	0.657049	0.0480487	1		11.4488	1	26.6667	88.6667
Cellular Processes:Cell Growth and Death:p53 signaling pathway	40	7	39	10	14	72	107	12	9	14	4	1	329		Cellular Processes:Cell Growth and Death:p53 signaling pathway	-0.094584	0.00894614	1		-0.479104	0.229541	0.2071	1		-0.738878	0.545941	0.0768741	1		0.0894304	1	24.5	30.3333
Metabolism:Energy Metabolism:Photosynthesis - antenna proteins	37	34	0	51	0	38	0	17	0	0	0	30	207		Metabolism:Energy Metabolism:Photosynthesis - antenna proteins	0.328871	0.108156	1		-0.388809	0.151173	0.258863	1		-0.353553	0.125	0.279702	1		3.40597	1	7.83333	26.6667
Cellular Processes:Transport and Catabolism:Endocytosis	2	1	6	5	0	13	84	3	1	3	2	2	122		Cellular Processes:Transport and Catabolism:Endocytosis	-0.260086	0.0676447	1		7.23388e-17	5.23291e-33	0.5	1		-0.709087	0.502804	0.089955	1		0.676934	1	15.8333	4.5
Metabolism:Xenobiotics Biodegradation and Metabolism:1,1,1-Trichloro-2,2-bis(4-chlorophenyl)ethane (DDT) degradation	12	1	40	30	5	6	4	0	16	5	1	0	120		Metabolism:Xenobiotics Biodegradation and Metabolism:1,1,1-Trichloro-2,2-bis(4-chlorophenyl)ethane (DDT) degradation	-0.107707	0.0116007	1		0.141661	0.0200678	0.410118	1		-0.0247841	0.000614251	0.484224	1		2.71617	1	4.33333	15.6667
Genetic Information Processing:Transcription:Basal transcription factors	13	9	20	12	7	13	2	0	5	16	3	19	119		Genetic Information Processing:Transcription:Basal transcription factors	0.483036	0.233324	1		-0.286328	0.0819838	0.32024	1		0.451697	0.20403	0.222543	1		1.68133	1	7.5	12.3333
Metabolism:Biosynthesis of Other Secondary Metabolites:Betalain biosynthesis	6	0	8	13	3	3	21	0	1	7	2	0	64		Metabolism:Biosynthesis of Other Secondary Metabolites:Betalain biosynthesis	-0.326591	0.106662	1		0.223607	0.05	0.358843	1		-0.563357	0.317371	0.161351	1		0.00757002	1	5.16667	5.5
Metabolism:Metabolism of Terpenoids and Polyketides:Biosynthesis of type II polyketide products	1	0	2	5	3	4	15	0	0	1	1	15	47		Metabolism:Metabolism of Terpenoids and Polyketides:Biosynthesis of type II polyketide products	0.353059	0.124651	1		0.739795	0.547297	0.076481	1		-0.656392	0.430851	0.114456	1		0.805912	1	5.33333	2.5
Metabolism:Biosynthesis of Other Secondary Metabolites:Caffeine metabolism	8	3	6	1	0	11	8	1	0	2	0	4	44		Metabolism:Biosynthesis of Other Secondary Metabolites:Caffeine metabolism	0.204357	0.0417619	1		-0.846649	0.716814	0.0352033	1		-0.708683	0.502232	0.0901361	1		1.18072	1	2.5	4.83333
Metabolism:Glycan Biosynthesis and Metabolism:Various types of N-glycan biosynthesis	9	2	14	2	0	11	0	0	0	0	0	5	43		Metabolism:Glycan Biosynthesis and Metabolism:Various types of N-glycan biosynthesis	0.335067	0.11227	1		-0.482451	0.232759	0.205232	1		#DIV/0!	#DIV/0!	#DIV/0!	#DIV/0!		4.87466	1	0.833333	6.33333
Metabolism:Biosynthesis of Other Secondary Metabolites:Indole alkaloid biosynthesis	4	0	7	0	1	1	5	0	1	4	2	0	25		Metabolism:Biosynthesis of Other Secondary Metabolites:Indole alkaloid biosynthesis	-0.384002	0.147457	1		-0.311086	0.0967742	0.305199	1		-0.152499	0.0232558	0.403294	1		0.0136986	1	2	2.16667
Environmental Information Processing:Signal Transduction:Calcium signaling pathway	2	2	0	3	0	2	0	1	0	0	0	2	12		Environmental Information Processing:Signal Transduction:Calcium signaling pathway	0.347904	0.121037	1		-0.353553	0.125	0.279702	1		-0.353553	0.125	0.279702	1		2.72727	1	0.5	1.5
Metabolism:Enzyme Families:Cytochrome P450	0	0	2	4	2	0	1	0	0	1	0	0	10		Metabolism:Enzyme Families:Cytochrome P450	0.00147478	2.17498e-06	1		0.755929	0.571429	0.069663	1		-0.288675	0.0833333	0.318809	1		2.04545	1	0.333333	1.33333
Metabolism:Glycan Biosynthesis and Metabolism:Glycosphingolipid biosynthesis - lacto and neolacto series	0	0	1	0	1	1	1	0	1	1	1	0	7		Metabolism:Glycan Biosynthesis and Metabolism:Glycosphingolipid biosynthesis - lacto and neolacto series	0.0417406	0.00174228	1		0.57735	0.333333	0.154034	1		0.353553	0.125	0.279702	1		0.294118	1	0.666667	0.5
Environmental Information Processing:Signaling Molecules and Interaction:G protein-coupled receptors	0	0	0	0	0	0	4	0	0	2	0	0	6		Environmental Information Processing:Signaling Molecules and Interaction:G protein-coupled receptors	-0.35631	0.126957	1		#DIV/0!	#DIV/0!	#DIV/0!	#DIV/0!		-0.53033	0.28125	0.178953	1		2.14286	1	1	0
Metabolism:Biosynthesis of Other Secondary Metabolites:Clavulanic acid biosynthesis	0	0	6	0	0	0	0	0	0	0	0	0	6		Metabolism:Biosynthesis of Other Secondary Metabolites:Clavulanic acid biosynthesis	-0.0615067	0.00378308	1		0	0	0.5	1		#DIV/0!	#DIV/0!	#DIV/0!	#DIV/0!		1	1	0	1
Genetic Information Processing:Translation:mRNA surveillance pathway	0	0	0	4	0	0	0	0	0	0	0	0	4		Genetic Information Processing:Translation:mRNA surveillance pathway	0.0550323	0.00302856	1		0.353553	0.125	0.279702	1		#DIV/0!	#DIV/0!	#DIV/0!	#DIV/0!		1	1	0	0.666667
Metabolism:Biosynthesis of Other Secondary Metabolites:Isoflavonoid biosynthesis	1	0	2	0	0	0	1	0	0	0	0	0	4		Metabolism:Biosynthesis of Other Secondary Metabolites:Isoflavonoid biosynthesis	-0.332858	0.110795	1		-0.353553	0.125	0.279702	1		-0.707107	0.5	0.0908451	1		0.769231	1	0.166667	0.5
